# Supplementary material for: Enhanced Photocatalytic Activity of Nonuniformly Nitrogen-Doped Nb2O5 by Prolonging the Lifetime of Photogenerated Holes
Source: MDPI journal article supplement (doi:10.3390/nano12101690), 2022-05-16
Supplement: s1 [file s1]

## Supplementary Materials

# Enhanced Photocatalytic Activity of Nonuniformly Nitrogen-Doped Nb<sub>2</sub>O<sub>5</sub> by Prolonging the Lifetime of Photogenerated Holes

Wei Guo, Chang Bo, Wenjing Li, Zhiying Feng, Erli Cong, Lijuan Yang and Libin Yang \*

Tianjin Key Laboratory of Brine Chemical Engineering and Resource Eco-utilization, College of Chemical Engineering and Materials Science, Tianjin University of Science and Technology, Tianjin 300457, China;  
weiguo@mail.tust.edu.cn (W.G.); bochang@mail.tust.edu.cn (C.B.);  
lwj0606s@mail.tust.edu.cn (W.L.); zhiying@mail.tust.edu.cn (Z.F.);  
cel@mail.tust.edu.cn (E.C.); yanglijuan@mail.tust.edu.cn (L.Y.)  
\* Correspondence: yanglibin@tust.edu.cn; Tel.: +86-0226060-1110

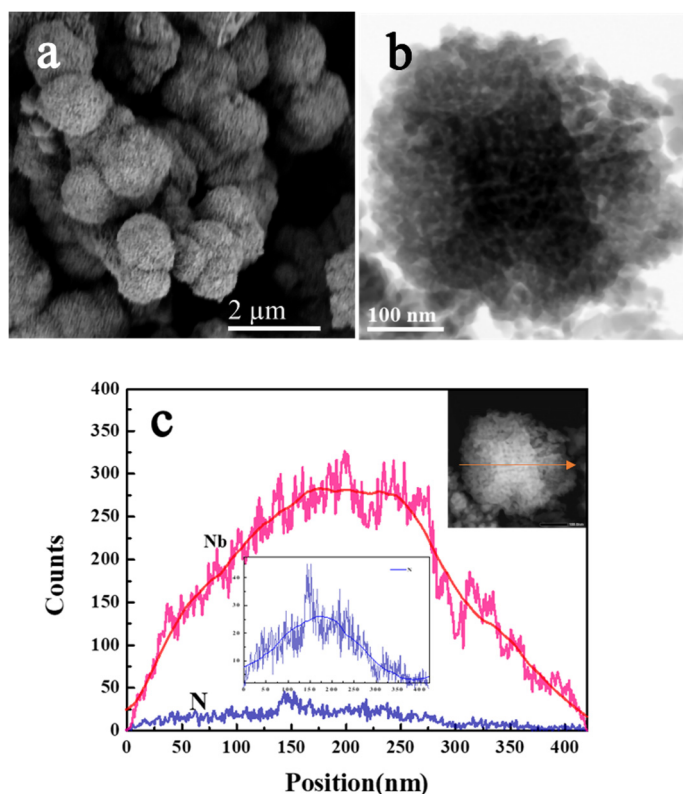

**Figure S1.** (a) SEM images, (b) TEM images and (c) EDS line scan of the 2@5@8@10NNbO<sub>5</sub>.

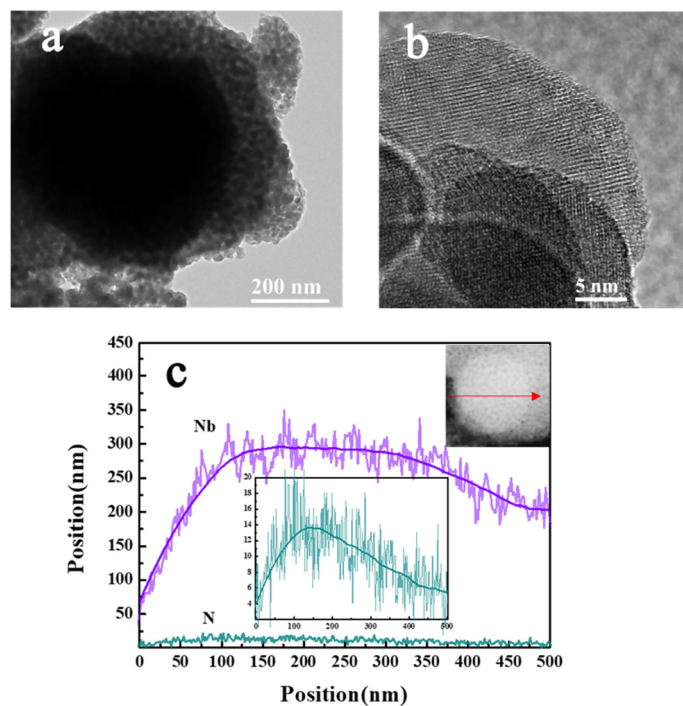

**Figure S2.** (a) SEM images, (b) TEM images and (c) EDS line scan of the  $\text{Nb}_2\text{O}_5@10\text{NNbO}$ .

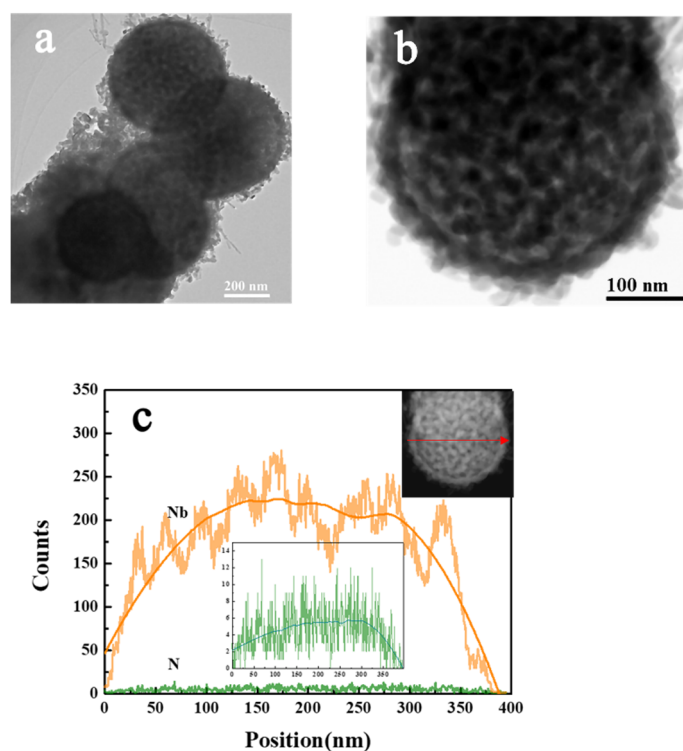

**Figure S3.** (a) SEM images, (b) TEM images and (c) EDS line scan of the  $10\text{NNbO}@ \text{Nb}_2\text{O}_5$ .

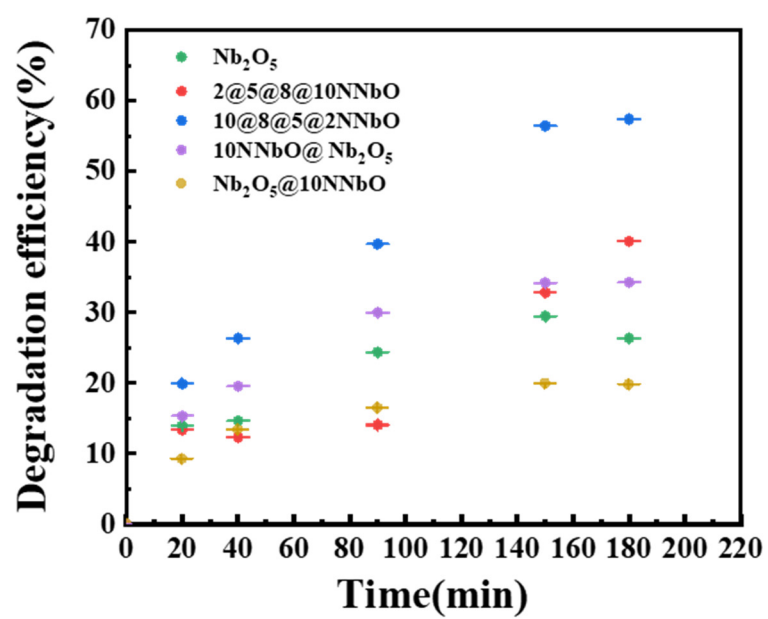

**Figure S4.** The degradation curves of photocatalytic materials varied with illumination time under UV radiation.
